# Supplementary material for: Temporally restricted activation of IFNβ signaling underlies response to immune checkpoint therapy in mice
Source: Nat Commun. 2022 Aug 19;13:4895. doi: 10.1038/s41467-022-32567-8 (PMC9390963; doi:10.1038/s41467-022-32567-8)
Supplement: Supplementary file 4 — Supplementary Data 1 [file 41467_2022_32567_MOESM4_ESM.xlsx]

## Sheet: Sheet1
	Bulk RNA seq data
	Differentially expressed genes across time for AB1 (Sheet 2) and Renca (Sheet 3)
	Differential expression analysis with Sleuth (v0.29.0)
	Comparison of responders and non-responders using a model containing time-point and response as covariates
	p-values aggregated from transcript differential expression to gene-level results using Lancaster’s method
	Genes were deemed differentially expressed at a false-discovery rate of less than 5%

## Sheet: AB1 DE
AB1
Ifi27
Samhd1
Ly6e
Tap1
Stat2
Apol6
Psmb8
Gbp4
Stat1
Meg3
Psmb9
Iigp1
Rian
H2-K1
Oasl2
Ppt1
H2-T22
C1s1
Tap2
Xaf1
Tgtp1
Pla2g16
Ly6c1
Gbp3
Parp9
Hk3
Batf2
Tmem173
C130026I21Rik
Klrk1
Tnfsf13b
Ptprc
Cd40
Fbxl5
Matk
Gbp9
Cd300lf
Sp110
C1s2
Trafd1
Psme1
Ly6a
Gbp5
Slit2
Naaa
Zbp1
Ifi47
Uba7
Irf1
Parp11
Ushbp1
Fanca
Irf7
Gbp6
Col14a1
Clec5a
Irgm1
Prss23
Apol9a
Prf1
Ms4a4c
Psme2
Gbp8
Ciita
Prdx5
H2-T23
Itgal
Wars
Mmp12
Tmem140
Sod2
Fxyd5
Ube2l6
Irf8
Gzma
Phf11d
Erap1
Lair1
Elmo2
H2-T10
H2-D1
Sp100
Slc11a1
Plxnd1
Psmb10
Slc27a1
Sulf1
Gm4070
H2-Ab1
Oas3
Cp
Pim1
Pld4
Sp140
Col15a1
Cspg4
4933412E12Rik
Osmr
Ly6c2
Tapbp
Nampt
Serpinf1
Syt15
Dtx3l
Postn
Tmsb15a
A530040E14Rik
Apol9b
Eomes
Igf1
Ctsc
Nfatc4
Serpina3g
Tgm2
Sbno2
Ggct
Idnk
Gbp10
Firre
Casp4
Colec12
Ms4a6b
Enpp2
Cpxm1
Ly6i
Cdh11
Ogfrl1
Sppl2a
Vwa5a
Ccr2
Mfap2
Gbp2
AB124611
Fgr
Hdac9
Fam49b
Tnfaip2
Znfx1
Herc6
Slc25a37
Tgtp2
Il11ra1
Ubash3b
Csf3r
Aida
Klra3
Igtp
Hck
Cfb
C2
Pdlim1
Fgd2
Cd59a
Eln
Clec11a
Pfkfb3
Ifi44
Rgs1
Slc4a11
Tnfrsf14
Srpx
AC119228.1
Plac8
Vwf
AW112010
Lcn2
Scn7a
Rnf19b
Gm26902
Gm5431
Epha3
Rtp4
A530032D15Rik
Spata13
Nrep
Sema4a
Dnm3
Fndc1
Htra3
Bst1
Ltbp2
Cxcl12
Ccl2
Tgfbi
Ptpn6
Gpr137b
Nod1
Lap3
Isg20
H2-Q4
Parp12
H2-K2
Pnp
Entpd1
Coq8a
Tgif1
Il12rb1
Cxcl1
Stx3
Slc6a7
AU020206
Gm10419
Inpp5j
H2-Q6
Klrb1b
Irgm2
Tmem98
1600014C10Rik
Slamf8
Msr1
Sparcl1
Gm15056
Deptor
Gm8995
Cxcl16
Lpin2
Rnf114
Il18bp
Slc16a7
Rgs5
Gbp11
Hsd11b1
Gm7609
Ccdc88b
Nlrc5
Rap1gap2
Il2rb
Ifih1
H2-DMa
Clnk
Adamts15
9530082P21Rik
Oas2
Aif1
Fbln1
Zmynd15
Serping1
Dhx58
Gdf10
Cabp4
Dennd6b
Trim30b
Klre1
Pomp
Cybb
Stx1b
Nfatc1
Ccl9
Hcls1
AC154187.1
S100g
AC163635.1
Arid5a
Grina
Cd72
C3
Ddx60
Ccrl2
Ncf1
Gm19585
Adgrg5
Bak1
Casp12
Npr1
Cxcl11
Lilrb4a
Il1rl1
Lrrc17
Gpr141
Zfp354c
Fyb
Arntl2
Trim21
Ctsh
Lcp2
Lrrk1
Pgs1
Grb10
Ccdc8
Egfl7
Rhbdf2
Plbd1
Upp1
Lama2
Bicc1
Gpm6b
Gpr35
Serpine2
Camk2a
Gsdmd
Milr1
Pilra
Fcrl6
Treml2
Prrg3
Htra1
Tor1aip1
Susd6
Ikbke
Fbln7
Tspo
Srgn
Spns2
Fbn2
Ptprg
Dbnl
Ncam1
Ttyh2
Parp14
Tifab
Pi16
Inhbb
Il12rb2
Slc2a6
Klra7
Trem3
Gm2619
Ogfr
Apol7a
Kif23
Ccr5
Grrp1
Arrb2
Kank3
Cd200r4
Cxcl9
Gls
Gm16026
H2-M3
Mecom
Tagln
Fendrr
Gpnmb
Gpr33
Col6a2
Slamf7
Cd36
Mndal
Adamts2
Ifi204
Vav1
Abr
Usp18
Itga11
Gm9821
Armh4
Ndn
Adra2a
H2-DMb1
Gpr152
C1ra
Tifa
Tfpi
Mboat2
Gk
1500015O10Rik
Ccdc80
Slc37a2
Plxna4
Slc15a3
Apol10b
Tlr3
Stc1
AA467197
Emc9
Cd86
Csrp2
Gpr137b-ps
Trdc
Fat4
Zfp521
Chd3
Zup1
Fbxw17
Olfr1246
Fap
Cd209a
Mmp3
Kif26a
Sipa1l1
Ackr1
Gm6637
Nup210
Calcrl
Lilr4b
Pitpnm1
Gatm
Ntn1
Sh2d1b2
Pilrb1
Aig1
Tnp2
Klrg1
Cygb
Tmpo
Gm15821
Cxcl10
Slc16a1
9330175E14Rik
Snx20
Ccdc3
Myd88
1110038F14Rik
Tlr12
Gm12250
Ptpn7
Tor3a
Neurl3
C730034F03Rik
Xcr1
Tapbpl
Srpx2
H2-Q2
Adar
Acta2
Ptk2b
Gm4759
Ace
Chd7
Gm38345
Lat2
Pde1c
Unc5c
Chrdl1
Clec7a
Slc28a2
Gm43302
Gm4951
Pde3a
Uggt1
Dnase1l3
Cpxm2
Sdad1
Mylk
Tmem243
Hhex
March1
Il2rg
Trpm2
Tbc1d9
Parp10
Msrb1
Stum
Cnrip1
Rab43
Hspa4l
Klri1
Arhgdib
Mark1
Cd52
Pdgfb
Fmod
P2ry14
Tax1bp1
AU021092
Klra13-ps
Ptprb
Serpina3f
Wwp2
Tmem176a
Pgm5
Scimp
Pbx1
Meox1
AI662270
H2-T-ps
Fgd5
Rab32
Gm49410
Serpinb6b
Gm2666
Kera
Abca8a
Agtr1a
Rab38
Gnb4
Psma7
Pdgfra
Megf6
Bhlhe41
Ifi203
Ddx58
Gdf11
Zyx
Pik3r3
Fbxl7
Abca5
Bst2
Selp
Ms4a6c
Xdh
Esyt1
Rmi2
Ifitm1
Vstm4
Clcn7
Has2
Ttc39b
Mmp27
Tsc22d1
Lacc1
Klrb1f
Tvp23a
Klrb1c
Tspan18
Lum
Pml
Cmtm7
Muc20
Gbp2b
Dna2
H2-Eb1
Adcy3
Klri2
Apol11a
Arid5b
Plek
Stk38l
Glrx
Dusp28
Tmem64
Abcg2
Ppfia4
Pkm
Il1b
Col6a6
Sh2d2a
Aoc3
Coro1a
Ctsf
Gm1966
Tfpi2
Acaa2
9530077C05Rik
Gm8909
Stra6
Gcsam
Notch3
Themis2
Hc
4930404N11Rik
Abca6
Blnk
Pf4
C1rl
Dirc2
Nkg7
Ms4a4b
Lrrc15
Itgae
Mageh1
Gm42763
Kynu
Npc2
Gsap
BC147527
Arhgap15
Lpcat2
Scly
Thbs4
Dynlrb1
Calhm6
Chst15
Pcolce2
Rab27a
Enpp3
Enc1
Slco2b1
Gm7592
Fcrls
Phf11b
Ifi209
Dchs1
Akt3
Rnase6
Xcl1
C130074G19Rik
Tmem35a
Cacna1e
Fcgr2b
Whamm
Ror1
Trim30a
Gm5970
Rbl1
Cflar
Socs1
Clec9a
Abcg3
Fzd3
Ifng
Azin2
Gbp7
Gm11714
Adamts12
Ero1lb
Il6st
Tmem44
Ifi44l
Prkcd
Vcam1
H2-Q7
Adam23
Fscn1
Arsi
Gm43181
5430427O19Rik
Syngr1
Rtl1
H2-Bl
Plcg2
Gng11
Serpinb9b
Cd274
Krba1
Nfasc
Nub1
Adgrg1
Cfap100
Dusp9
Gm45472
Myl9
P2ry13
Kbtbd11
Mfsd12
Plcg1
Gm15433
Bcl2a1a
Mov10
Fabp4
Galnt16
Aox3
Gm44751
Ncoa4
H2-T24
Gm45708
Tmem246
Arhgap31
Mxd1
Gpx3
Gm6034
Tril
Tlr6
Htra4
Pycard
Ncf4
Serpine1
Ifi35
Galm
Sectm1a
Dpt
Cthrc1
Clic5
Trim47
Hist1h2bc
Wtip
Ifitm3
B2m
Gtf2i
Cd59b
Hrh2
Olfr558
Lrrc32
Knstrn
Rmdn3
Wdfy4
Shank3
Tubb2b
Gm21188
Txk
1700071M16Rik
Ctsw
Cd69
Clec14a
Gm43305
Gzmb
Syne1
Ly75
Brinp3
H2-Q10
Olfr56
4833422C13Rik
Lmo7
Cxcl5
Myo1d
Gm17334
Tyro3
Gpr31b
3110039I08Rik
Ptpn1
Bcr
Ildr2
Mlkl
Scara3
Miat
Mmp14
9930111J21Rik2
Atp1b2
Clec4e
Pilrb2
Slc12a9
Anxa8
Kat2b
Serpinb8
Gm8093
Angpt4
Gm20412
Prc1
Angptl1
Tarm1
Klrd1
Oas1g
Ifi214
C1qtnf7
1810059H22Rik
Jag1
Ms4a4d
Abcb4
Entpd2
Kazn
Cnnm4
Myct1
Slc16a12
Trim30d
Prr5l
Slc14a1
Jam3
Cacna1c
Rgs7bp
Fpr2
Hey1
Ass1
Galnt17
Per3
Colgalt1
Aebp1
Cfh
Sell
Cd209d
Gm43802
Fcgr1
Mitd1
Slc29a1
Irak2
Lmna
C1rb
Sdc3
Gas6
Oas1b
Sparc
Mmp25
Hist2h2be
Stat3
Mycbp2
Twsg1
Nuak2
Map3k7cl
Abcc1
Fuca2
Tspan7
Enpp4
Apcdd1
Gpr15
Ptgs2os2
9130208D14Rik
Bace2
Fkbp7
Gm16675
Sytl3
Itga1
Ncr1
Gm48309
Dbp
Chmp4b
Cers6
Emx2
Ccl3
Bid
Sowahc
Phf11a
2810025M15Rik
Ifit1bl2
Gm42718
Gpr18
Clec10a
Cd180
Arhgap24
Acod1
Saa3
Lmod1
Tcaf2
AC166110.3
Ido1
Ccl7
Gga2
A930007I19Rik
Ifi27l2a
Mpp2
Klra1
Mtmr10
Rnf31
Cd244a
Adgrl4
Idh2
Trabd2b
Gm20496
Rnf213
Igfbp5
Slc2a10
Cd209c
Abca8b
Tlr9
Hhipl1
Pkp2
Gdap10
Nfkbie
Slfn8
Map3k6
Zbtb32
Pik3ap1
Grpr
Tmem204
Rasip1
Coro2b
Abat
Sept3
Il27
Nlrp10
Clec3b
Pvrig
Slfn4
Dtx4
Hcar2
Stab1
P4ha2
Atp6v0a2
Npas2
Il21r
Trim30e-ps1
BC028528
Lepr
Zfp704
C1qtnf9
Aoah
Sfrp2
Fam124a
Htt
Triobp
Ctps
Btnl9
Ltbp1
Gm7967
A230050P20Rik
2200002D01Rik
Slfn1
Gm8979
Acat1
Slc6a9
Apobec3
Cdca3
Bzw2
St6gal1
AW551984
Fcer1g
Mpeg1
Reg2
Gm15229
Mfap3l
Wdr91
Gpr171
Etv1
Spc24
Asb2
Vipr2
Il15ra
Arpc1b
Ifi213
Pgd
Tagap
Unc93b1
I830127L07Rik
Tnn
Mamld1
Acox3
Mmp17
Traf3ip3
H2-Q5
Cdc42ep5
Mall
Nupr1
Sox7
Psd4
Arl5c
Azi2
Esam
Tnmd
Fgl2
Cdk18
Ctdsp2
mt-Nd4l
Gbgt1
Insl6
C1qtnf2
Grem2
Cd74
Pigk
Styk1
Casp1
Lifr
Trim34b
Tsc22d3
Lnpep
Acot4
Mcpt2
Sncg
Gda
Lrrn2
Zc3h12d
Ces2g
Trpv2
Cnn3
Sema3g
Birc3
Coro7
Dclk1
F3
Amigo2
Fbxo6
2900027M19Rik
Ubald2
Mrtfb
Pcdh1
Ubd
Arxes2
Efnb1
Susd2
Hk1
Cipc
Fgf11
Ly86
Gm49751
Drp2
Hpgd
Kcnj14
Heyl
Eif2ak2
Man2a2
Tbxas1
Akr1b10
E230029C05Rik
Plcl1
Fes
Rspo1
Apol11b
Arel1
Gm48274
Cbr1
Zfp281
Ch25h
Arhgap30
Dennd1c
Id2
Gm16685
Gm30918
Igf1r
D030025P21Rik
Gm12216
Platr22
Lpl
Fas
AC102342.2
Bcl6
Adcy5
Heatr1
I830077J02Rik
Fcgr3
Lgals8
Gm42742
Lims2
Gmfg
Plekhf2
Gm41192
Adgre5
Gli1
Ido2
Atp11b
Tspan2
Olfr753-ps1
Klra2
Gm5960
Gpr84
Tll1
Otud1
Rps6ka4
Glrx5
Bhlhe22
Cemip
Foxf1
Sox18
Heph
Mgp
Pfkp
Duox1
H2-Aa
En1
Tnfsf10
Gabra3
E330013P04Rik
Dock6
Hemgn
Mafk
AI506816
Kcnn1
Cdh13
Marveld1
Slc29a3
Ralgds
Stmn1
Naip2
Gm8989
Tns1
Grk5
St8sia6
Klrc1
Gm16094
Tpp1
Nek2
Acvr1b
Cyp4b1
Lgi4
Slc2a1
Vgll3
Gm34425
Sh3bp2
Vkorc1
Cyp4f18
Rap2c
Mgll
Slco3a1
Cdc25c
Rps4l
Slc35f1
AC102342.1
Hnmt
Mmp28
Serinc5
Gm13889
Gm15990
Kif5c
Cst7
Ebf2
Zbtb18
Pde4b
Myzap
Ldlr
Lima1
Tnip3
Dot1l
Klf3
Zfp462
Samd3
Slc6a8
Lck
Zdhhc14
Efna1
Tmem132a
Tinagl1
Smpdl3b
Aplnr
Gnas
Mvp
Icam1
Cxadr
Gm42427
Nr5a2
Oasl1
Cdca8
Card11
C4a
Myo1f
Il1f9
Slc22a23
Lrrc25
Runx3
Psme2b
Gm18852
Gm10134
Psen2
Sfrp1
Cd300lg
Thbs1
Lgals3bp
Palmd
Thsd7a
Mmp13
Lrch1
Itm2a
Hpse
Tnfsf14
Col6a3
Rai14
Gm47163
Card10
Pamr1
Fam241a
Treml4
Msh4
Vamp8
Sms
Wnt10a
Eps8l2
Top2a
March3
Gtpbp2
Katna1
Dio3
Vash1
Itgb8
Gm17017
Gm37077
Gm17132
Magohb
Bcl2a1b
H2-DMb2
Phyhd1
Mx1
Ikzf1
Flna
Nptx1
Trex1
H2afy
Tlr2
Nt5c3
Ndst1
Rilpl1
Crybg1
Efs
Ifi208
Msi1
Etv6
Dact1
Nsg1
Gstm5
Gm15280
Psip1
Ajuba
Gzmc
Mt2
Slc16a2
Cmbl
Col1a1
Tespa1
Synm
Golm1
Olfr646
Isca1
Hist1h4i
Herpud1
Fnbp1l
Slc39a8
Scube3
Skap2
Olfr1152
Smim5
Lpin1
Atp2b4
Vps54
Zswim4
Notch2
Hmgb2
Lrfn3
Tpcn1
Gm47968
Tmco4
Slc9a5
Agtrap
Tut7
Cpq
Fosb
Zfp503
Gm3555
Depdc1b
Evi2b
Lmo4
Tnfaip3
Rubcnl
Diras2
Tppp
Klhl29
Mtap
Exoc3l4
Gm43652
Acap3
Dnajc21
Msrb2
Tie1
Psma5
Tlr4
Gm35371
Tmbim4
Lyn
Sash1
Trim12c
Afap1l1
Ear2
Fzd7
Slfn9
Nfkbib
2900026A02Rik
Adcyap1r1
Irx2
Atp8b4
Plekho2
Aif1l
Siglec1
Rbms1
B4galt5
Socs3
Plscr1
Itpka
Galnt3
Chst7
Ddit4l
Pde4dip
Kcnma1
Mgmt
Tnrc18
St6galnac3
Mmrn2
Pycr1
Tspyl4
Rilpl2
Ppm1e
Dgat1
Psma4
Skap1
Sirpb1c
Snhg5
Tmeff2
P3h2
Fndc4
2310031A07Rik
Mrc1
Ypel2
Gm29055
Zfp773
Ms4a8a
Unc13b
Shc2
Daam2
Serpinb9
Tenm4
Steap3
Epm2a
Gramd4
Usp11
Sulf2
Pcyt1a
Ablim1
Net1
Adora3
Evl
Dmd
Tgfbr2
Efna5
Bard1
Il18rap
1110008P14Rik
Prss35
Fam174a
Tpm3
Gm17555
Tpm1
Htr7
Nlrc4
C920021L13Rik
Gaa
Agap2
Slc43a3
Trem1
Tmsb10
Pld3
Gm5483
Ppm1l
Pik3cg
Phactr1
Gm47493
Adgrl2
Masp1
Exoc3l2
Ccl4
Med25
Cd160
Sned1
Ptprd
Gpc3
F2rl2
Prdm16
Naa25
AC102496.1
Gm28321
Bmp3
Tbc1d16
Gm29721
Lgr5
Pdgfc
Tbx2
Epor
Dnah1
Olfr509
Rora
Rflnb
4930539E08Rik
Serpina3i
Wrn
Zfp46
Jmjd1c
Gm20519
Gm47164
Rad54l
Osr1
Parp3
Olfr1459
Gm10025
Zbtb5
Igf2bp2
Camk2n1
Cyp2d22
AI504432
Cubn
Gm2396
Iqgap2
Mxd4
Hivep3
Gm28068
Spn
Podn
Bcam
Tmem50b
Ddx4
Fndc10
Gpr183
Avpr1a
Inka2
Psma2
BC035044
Gm33699
Prkab2
Shroom3
Fam181b
Itsn1
Heg1
Tcp11x2
Slamf6
Hist1h1c
Hmgcs2
Ntpcr
Gm43068
Prdm11
Ntn4
Il10ra
Fzd6
A930037H05Rik
Cep128
Gm49759
Dcaf6
Pimreg
Ccl24
Fam89a
Galnt18
Gm5398
Tnf
N4bp1
Irf2
Fam84b
Rcan1
Oas1a
Ube2ql1
Eif4e3
Rab40b
Mn1
Noc4l
Fcgr4
Glul
Tbx18
Spag5
Rab27b
Gm38043
Col5a1
Gm17767
Flot1
Apod
Itgb7
Jdp2
Pde8a
Plp1
Dock9
Irf5
Dbn1
Lrrc4
Inka1
Tlr1
C2cd2
Gm48498
Ncapd2
Cyren
Sectm1b
Fbxo42
Lrr1
Ctps2
Lrp4
Rab9
Tmem67
M6pr
Uhrf1bp1
F2rl1
Gm42462
Cmtr1
Rhoh
Klra10
Hrct1
Dlgap5
Fzd4
Gm9869
Gpm6a
Gm43909
Mmp2
Sox13
Gm11131
Ripk1
Ccdc86
Gm12187
Adgrg6
Noa1
Mirg
Mad2l1
Pcgf5
Dock4
Grem1
Brip1
Cgnl1
Dusp1
Gm12188
Ankrd11
Ifit2
Pmepa1
Hspa12a
Gamt
Mgat3
BC067074
Gm48964
Malat1
Meox2
Nfkbiz
Gm14085
AI427809
Tent5c
Ifit3
Myo5a
2210406H18Rik
Foxm1
AC126438.2
Slc9a3r1
Sbsn
Thap2
H2-Q1
Hdc
Tm6sf1
Lrrc8c
Sult1a1
Sytl4
Pkib
Csgalnact1
Ccl5
Pla2r1
Esco2
Svep1
Slfn10-ps
Stil
Adap1
Pxmp4
Adam12
Mx2
Cpne3
Armcx4
Pagr1b
Abcc9
Scara5
Lyz1
G430095P16Rik
Chrm3
Insrr
Cyba
Prr7
Aim2
Cacna2d4
Atp8a1
Gucy1b1
Gm17193
Lysmd2
Glrx3
Mmp15
Cndp2
Cyp8b1
Gm5127
Hoxa2
Dmp1
Robo4
Pdlim4
Cilp
Nhs
F830016B08Rik
Samd9l
Birc5
Asb13
Sox9
Itprip
Naa20
Htr2b
Hif1a
Ppp1r3d
Gca
Pkia
Slc8a1
Gm20743
Trib3
Ifi211
Mgat4b
Ftx
Gm49342
Tmtc2
Tmem100
Gm44075
Naa50
Ptn
Rassf4
Gm28035
Angptl4
Spred2
Ifit1
Col3a1
Plekhg3
Lst1
Col27a1
Galnt15
Nusap1
Gm6904
Wdtc1
Amer1
Tub
Il16
Mterf4
Bmp2
Gen1
Gpr27
Prkag2
5830432E09Rik
Fbxo5
Agpat5
Emx2os
Col16a1
Itgax
Gli2
Sla
C7
Pask
Rbmx
Mcm5
Olfr78
Nfe2l2
Thsd1
Gpr65
Dennd1a
Yap1
Kctd11
Nhlrc1
Pfkl
Ston2
Sirpb1b
Bcl2a1d
Ttyh1
Entpd4
Atp6v1b2
Cyfip2
Zhx3
Olfml1
Robo1
Krt20
Atrip
Nkd2
Calhm5
Nr1d1
Asf1b
Dexi
Dalrd3
4930430E12Rik
Galnt5
Foxf2
Map1lc3a
Utp14b
Zap70
Gna15
Mcemp1
Coro1b
Skil
Trim14
Traf3ip2
Tcaf1
Rgs18
Klrb1a
1700034H15Rik
Cyp4v3
Prune2
Gmpr
Isg15
Ska2
Ermp1
Ttc3
Exoc6
Acad12
Peg13
Thap6
Gm21370
Igsf6
Sh3bp4
Appl2
Tlr11
Il15
Dram1
Cdc45
Fhl5
Clec2d
Hcar1
Rab3d
Jag2
Pnmal2
Vmn1r216
H2-Ea-ps
Mamdc2
Plpp1
Xylt2
Bin2
Dlc1
Il13ra1
Col12a1
Prex2
Spaar
Dmrt2
Pdgfa
Atp6v0b
Zdhhc21
Adam19
Acp5
A530076I17Rik
Atp10a
App
Chchd10
Tmem163
Bub1b
Myl12b
Tbc1d30
Foxs1
Ctsk
Lrg1
Plce1
Fam57b
Cfp
mt-Nd6
Grhl2
Ptpru
Abcb9
Zc2hc1a
Fras1
Majin
Aldh2
Plekhn1
Vmn2r24
Fgf10
Stx7
Chka
Cdh5
Kcnn4
Bmper
Rab20
Cracr2b
Sorbs2
Col5a3
Cd47
Erich2
Klra5
Cxcr2
Gm18840
Pstpip2
Fasl
Wnt5a
Rpl39l
Oip5
Dnah7a
Tcim
Gm5049
Tbx21
Gm42519
Kif3b
Fgf1
Mxd3
Capn5
Smad6
Ntm
Mcpt1
2510009E07Rik
Txn1
Nlrp1b
Gm26531
Olfr1372-ps1
Cd55
Fam20c
Gm12185
Srd5a1
Klrc2
Col23a1
Abhd16a
Tmem255b
Jmy
H2-Ke6
Pla2g7
St3gal1
Ablim2
Brd2
Fam189a2
Gm14005
Akr1a1
Ncf2
BC026762
Tshz3
Vmn1r233
Cyp2j9
Aldh5a1
Id1
Gm48541
Sh2d1a
Naip5
Coa5
Havcr2
Creb3l1
Chsy3
Sirpb1a
Gm16213
Fzd8
Klhdc8a
Tfrc
1810058I24Rik
Cysltr2
Hivep1
Spi1
Zbtb44
Lrrk2
Prkcg
Exo1
Pxdc1
Gpsm3
Tmbim6
Il6ra
Lpar1
Fjx1
1700037H04Rik
Ndufa4
Gm33167
Gm4739
Cryzl2
Nck1
Gm9888
Gm46224
D430020J02Rik
Tnfrsf9
Suox
Chst2
Trim30c
Nrg2
Steap2
Tef
Oat
Cenpf
Clic4
Mcam
Dmpk
A030012G06Rik
Actc1
Ska1
Gna13
Itgb2
Sh2d1b1
P2rx6
Mical2
Adgrf5
Adgrl1
C1qtnf12
Crtam
Cry2
Stfa2l1
Gm17705
Gm47842
Ndc80
Clip2
Gm35240
Usb1
Ighm
Col18a1
Greb1l
Mki67
Soat2
Cluh
Tnfaip8l1
Gm32633
Peli1
Col6a5
Gprc5c
Adh1
Bin3
Coq9
Col6a1
Gch1
Cap1
Cd209g
Gm48786
Gm28177
Krt10
Cit
Rab3gap2
Cenpa
Fam110c
Pyroxd2
Gja4
Cavin2
Cd53
Gm42445
Ociad2
Ssbp2
Pcsk6
Bmpr1b
mt-Nd1
Slc16a9
Pcdhga6
Prkag3
Ptger3
Ablim3
Alox5ap
Slc26a11
Tmem176b
Slc22a17
Agmo
Kank4
Otulinl
Cdip1
Rtn4r
Mgst2
Zcchc7
Clec1a
Cryl1
Gad1-ps
Gm45774
Alpk1
Arhgap5
Tlcd2
Xpo1
Lmnb1
Naaladl2
Rbpj
Cpz
Zbtb7b
Serpina1b
Drosha
Pccb
Cmtm3
S100a10
Gm40578
Gpr4
Cebpb
Nsmf
Pla2g3
Lcp1
Dpep1
Abtb2
Trpv5
Abi3bp
Fbxl13
Atg2b
She
Gm15832
Lnx2
Plxdc2
Unc45b
Ethe1
Gm20056
Nbeal2
Il17rc
Adgrb2
Gm44958
Ripk2
Gm32014
Baiap2l1
Serpina3n
Fut7
Cenpn
Gm43633
Stard8
Gm42681
Slfn2
Grip2
Anp32e
Dip2b
Acsl1
Tnfaip8l2
Snap29
Ptpre
Emilin1
Klf10
Pxdn
Klhl42
Zim1
E230013L22Rik
Pcdhga5
Hdac3
Chp2
Snn
Clca3a1
Csk
Oit3
E2f2
Gm44861
Gm13632
Prn
Susd1
Wnt2
Rhox5
Trim56
Prim1
Il1rn
Nos2
Ppp1r9a
Crip2
Frrs1
Thrb
Adgrd1
Syt7
Slc40a1
Gsta4
Zfand5
Efcc1
AC105061.2
Fhod3
Nkiras1
Gm26648
Rxra
Gm18342
Aspa
Trpc3
Olfr149
Tjp1
Cyp3a13
Pecam1
Dpyd
Ramp2
Prnp
Rem1
Axl
Cyld
Adgre4
Gm49368
Cst6
Serpina3m
Nid2
Gm31392
AC151990.1
Snhg8
Klra4
Airn
Bok
H2afx
Mt1
Podxl
Thbs2
mt-Cytb
Gm48132
G6pdx
Ormdl3
Atp6v0d2
Syngr2
Gng12
Casp7
Aldh4a1
Gm47628
Bcl2
Sytl2
Gxylt2
Traip
Irf3
Cdkn2c
Gm47611
Pla2g4a
[truncated: 2,041 more rows]

## Sheet: Renca DE
Renca
Iigp1
Apol6
Clec4n
Cd40
Oasl2
Ly6e
Pnp
Stat2
Cx3cr1
Samhd1
Xaf1
Ucp2
Stat1
Sod2
Thbs3
Tgtp1
Lilrb4a
Ppfibp1
Gbp5
Pfkp
Tmem132c
Gbp4
Itgb5
Lilr4b
Naaa
Slc4a11
Rtp4
Bace1
Fxyd5
Gpr35
Phf11d
Sytl2
Parp9
Prdx5
Irgm1
Msr1
Zbp1
Cdh11
Mndal
Csf2ra
Batf2
Zyx
Edem1
Tkt
Appl2
Gm4070
Cycs
Rap2a
Tma16
Slc16a3
Slc2a1
Gbp3
Srrm2
Hal
Mxra8
Cxcl11
Cd80
Cbx6
Ly6c1
Man2a2
Ifi204
Clec5a
Slfn4
N4bp1
Gbp9
Wdr6
Klrb1b
Gm47968
Il4ra
Cd1d1
M6pr
Igtp
Cerk
Ifi205
Celsr2
Nfe2l2
Ass1
Tgtp2
Tap1
Fxyd2
Ncam1
Ctsd
Il1rn
Apol9a
Gm10053
Ldoc1
Irgm2
Serpinb6b
Il6ra
Slc39a14
Dchs2
Ctsl
Wls
Lifr
Ifi44
Prkx
Ppip5k1
Oasl1
Gprc5c
Gbp11
Ahnak2
Aox1
Tap2
Gstt2
Pilra
Tnfaip2
Ptprs
Plet1
Slco2b1
Capg
Cd86
Phlpp1
Trib1
H2afv
Ankrd23
Cox7b
Sptbn1
Abi2
Smpd1
Rarres2
Adcy1
Tnfaip8l3
Bst2
Kif1b
4931428F04Rik
Plaur
Gxylt2
Hspa8
Rack1
Traf1
Ptpn14
Zfp207
Kcnj14
Prss35
Gsap
Nuak1
Fth1
Hdac11
Sbno2
Cdc42bpa
Cyhr1
Ly6a
Pgs1
Timp3
Cntrl
Sppl2a
Klhl33
Cxcl10
Zrsr1
Btnl9
Npc2
Nisch
C1galt1
Ank2
Ptprh
Picalm
Pkd2
Gda
Tsc22d2
Tmem173
Xist
Pcdh10
Gm47476
Arhgef19
Rsad2
Vasp
Calu
Itgax
Sema7a
Rsrp1
Adgrg6
Ifi47
Ccl2
Gstm2
Nol3
Irf7
Ifih1
Wars
Zbtb11os1
Mertk
Gbp10
Rab20
Wipi1
Slc25a5
Ncf2
Mrgpre
Helz2
Lcp1
Tinagl1
Bicc1
Slco3a1
Stx1b
Ndst1
Dpep2
Ifi35
Uap1l1
Cytip
Cnn3
Pomp
Cd14
Cacna1g
Rbbp8
Met
Rflnb
Dzip1
Dram1
Cpeb4
Dnajc15
Haus4
C2
Vamp8
Afap1
Apcdd1
9530082P21Rik
Gm44511
Itga1
Ifi202b
Tapbp
Stra6
Arsb
Srgn
Plat
Col6a3
Arrb2
Cep164
Atp1b3
Pdgfc
Lap3
Hfe
Apol7a
Slc4a8
Zc2hc1c
Ms4a4c
Erlec1
Txn1
Pitpna
Gm38316
Nxf1
Psmb8
Fam241a
Sigirr
Ltb4r1
Pyroxd2
Sec14l1
Dapk1
Hs6st1
Ccser2
Tmem132a
Galc
Alcam
Gm4841
Agrn
Gm13237
Rasgrp4
Pisd-ps1
Nxpe5
Gbp2
Faah
Ifi27
Pilrb1
9930014A18Rik
Fkbp7
Nid2
Ogfr
Tmem176a
Clec4e
Olfr646
Creg1
Afdn
Npas4
Trps1
Fzd2
Timp2
Smim1
Mir17hg
Ptgs2os2
AC119228.1
Lpcat2
Myd88
Phyhd1
Bcl2a1d
Ypel3
Alox5ap
Adamts9
Glmp
Plekha2
Casp7
Pik3r3
Fcrlb
Fbn2
Ms4a6d
Ccl19
Gria1
Adamts16
P4ha2
Clcn7
Gpr141
Clec4d
Gpnmb
Sdc4
Rfc2
Cyp27a1
Tenm3
Gm44873
Cc2d2a
Mob1b
Nav3
Trim30d
Pck2
Hk3
Sema3b
Fcgr3
Trim30b
Tm6sf1
Map1a
Arpc4
March5
Mpzl1
Idh2
Gbp6
Gpi1
Gm8995
Tbk1
Pstpip2
Chst15
Serpina3g
Mkrn1
Gm42445
Trem2
Nasp
Zmynd15
Slc7a2
Oas1g
Cul4a
Irs1
C130026I21Rik
Fam32a
Angptl2
Ifi211
Pla2g7
Arhgef12
Gpatch8
Fam78b
Gm42047
Bak1
Pik3ip1
Cxcl16
Tor1aip1
Sv2a
Gm42547
Ipmk
Gpd2
Vamp2
Tmem150c
Uap1
Hspa12a
Akr1b3
P2rx6
Xdh
Oas3
Itga7
Nampt
Oas2
Igf1
Clec11a
Aph1c
Rhbdf2
Dpf1
Dnal1
Ch25h
Shroom3
Anxa2
Dcaf8
Mlkl
Tmem50b
E330013P04Rik
Creb5
Suox
Acvr2a
Trim30a
Cdkn1a
Dele1
Apol9b
Fam19a1
Nfkb1
Rab31
Thy1
Ivns1abp
Ripk2
Pm20d1
Fzd3
Cthrc1
Dock4
Actb
F830016B08Rik
Rab11fip5
BC023105
Tmem86a
Cd38
Dscam
Cdkn2c
L1cam
Gm7609
Shc2
Ifi30
Zfc3h1
Tmem136
Mettl7a1
Cep170b
Lrrc31
Cp
Nufip1
C1qtnf6
Plec
Dcaf6
Gpr33
Pnrc1
Nlrc5
Llgl2
Gm46223
Serpinb9
Plcg2
Ifi203
Ddah1
Rassf6
Rab11fip1
Psmb10
Slc22a23
Cox6b2
Gm42718
Gm47761
Gm36723
Plekha6
Dst
Glipr2
Anpep
Cd177
Gatm
Rap2c
AC160336.1
Piwil2
Selenbp1
Cdh16
Hmgb2
Ttc30b
Palm
Syngr2
Syne2
Ank3
AC163635.1
Plekhn1
Cacna2d2
Cep97
Miat
Gm53
Zcchc24
Rps15a
Spi1
Nos2
Dnmt3a
Ccl22
Spen
Mxd4
Dmrt2
Cask
Zscan29
Sms
Gm19705
Adh5
Tagln
Pcdhgc5
Lacc1
Ankrd33b
Crim1
Saa3
Slc20a1
Abca1
Aqp5
Coa5
S100a4
Lgr5
Setbp1
Ppt1
Orai1
Cxcr4
Nf2
Ssu2
Irf9
5830408C22Rik
AI464131
Lynx1
Setd7
Fcer1g
I830127L07Rik
Slmapos2
Vegfb
Gm8979
Cfp
Sat1
Cox5a
Aig1
Casp12
Spred1
Fcgr1
F10
Parp12
Cd300ld
Ormdl3
Runx3
Kif5c

## Sheet: Overlap DE
Overlap
Iigp1
Apol6
Clec4n
Cd40
Oasl2
Ly6e
Pnp
Stat2
Samhd1
Xaf1
Stat1
Sod2
Thbs3
Tgtp1
Lilrb4a
Gbp5
Pfkp
Gbp4
Lilr4b
Naaa
Slc4a11
Rtp4
Fxyd5
Gpr35
Phf11d
Sytl2
Parp9
Prdx5
Irgm1
Msr1
Zbp1
Cdh11
Mndal
Csf2ra
Batf2
Zyx
Appl2
Gm4070
Tma16
Slc16a3
Slc2a1
Gbp3
Cxcl11
Cd80
Ly6c1
Man2a2
Ifi204
Clec5a
Slfn4
N4bp1
Gbp9
Klrb1b
Gm47968
M6pr
Igtp
Ifi205
Nfe2l2
Ass1
Tgtp2
Tap1
Fxyd2
Ncam1
Il1rn
Apol9a
Irgm2
Serpinb6b
Il6ra
Slc39a14
Lifr
Ifi44
Prkx
Oasl1
Gprc5c
Gbp11
Aox1
Tap2
Pilra
Tnfaip2
Slco2b1
Cd86
Trib1
Sptbn1
Abi2
Smpd1
Tnfaip8l3
Bst2
Kif1b
Gxylt2
Rack1
Traf1
Kcnj14
Prss35
Gsap
Sbno2
Ly6a
Pgs1
Sppl2a
Cxcl10
Btnl9
Npc2
C1galt1
Ank2
Picalm
Gda
Tmem173
Xist
Vasp
Itgax
Adgrg6
Ifi47
Ccl2
Irf7
Ifih1
Wars
Gbp10
Rab20
Ncf2
Helz2
Lcp1
Tinagl1
Bicc1
Slco3a1
Stx1b
Ndst1
Dpep2
Ifi35
Uap1l1
Cytip
Cnn3
Pomp
Cd14
Rflnb
Dram1
Dnajc15
C2
Vamp8
Apcdd1
9530082P21Rik
Gm44511
Itga1
Ifi202b
Tapbp
Stra6
Srgn
Plat
Col6a3
Arrb2
Atp1b3
Pdgfc
Lap3
Apol7a
Ms4a4c
Txn1
Gm38316
Nxf1
Psmb8
Fam241a
Ltb4r1
Pyroxd2
Hs6st1
Tmem132a
Gm4841
Gm13237
Rasgrp4
Pisd-ps1
Nxpe5
Gbp2
Ifi27
Pilrb1
Fkbp7
Nid2
Ogfr
Tmem176a
Clec4e
Olfr646
Smim1
Ptgs2os2
AC119228.1
Lpcat2
Myd88
Phyhd1
Bcl2a1d
Alox5ap
Casp7
Pik3r3
Fbn2
Ms4a6d
P4ha2
Clcn7
Gpr141
Gpnmb
Gm44873
Trim30d
Hk3
Fcgr3
Trim30b
Tm6sf1
March5
Idh2
Gbp6
Gm8995
Tbk1
Pstpip2
Chst15
Serpina3g
Mkrn1
Gm42445
Zmynd15
Oas1g
C130026I21Rik
Fam32a
Ifi211
Pla2g7
Fam78b
Bak1
Pik3ip1
Cxcl16
Tor1aip1
Gm42547
Ipmk
Gpd2
Vamp2
Hspa12a
P2rx6
Xdh
Oas3
Nampt
Oas2
Igf1
Clec11a
Rhbdf2
Ch25h
Shroom3
Mlkl
Tmem50b
E330013P04Rik
Creb5
Suox
Acvr2a
Trim30a
Apol9b
Ivns1abp
Ripk2
Pm20d1
Fzd3
Cthrc1
Dock4
Actb
F830016B08Rik
Tmem86a
Cd38
Cdkn2c
Gm7609
Shc2
Zfc3h1
Cp
C1qtnf6
Dcaf6
Gpr33
Nlrc5
Serpinb9
Plcg2
Ifi203
Rab11fip1
Psmb10
Slc22a23
Gm42718
Glipr2
Anpep
Gatm
Rap2c
Piwil2
Hmgb2
Syngr2
Syne2
AC163635.1
Plekhn1
Miat
Spi1
Nos2
Dnmt3a
Mxd4
Dmrt2
Sms
Tagln
Lacc1
Crim1
Saa3
Coa5
Lgr5
Setbp1
Ppt1
Irf9
AI464131
Fcer1g
I830127L07Rik
Gm8979
Cfp
Aig1
Casp12
Fcgr1
Parp12
Ormdl3
Runx3
Kif5c
